# Contrasting Modes of Mitochondrial Genome Evolution in Sister Taxa of Wood-Eating Marine Bivalves (Teredinidae and Xylophagaidae)

Yuanning Li <sup>1</sup>, Marvin A. Altamia <sup>2</sup>, J. Reuben Shipway <sup>3</sup>, Mercer R. Brugler <sup>4,5</sup>, Angelo Fraga Bernardino <sup>6</sup>, Thaís Lima de Brito <sup>7</sup>, Zhenjian Lin <sup>8</sup>, Francisca Andréa da Silva Oliveira <sup>7</sup>, Paulo Sumida <sup>9</sup>, Craig R. Smith <sup>10</sup>, Amaro Trindade-Silva <sup>7</sup>, Kenneth M. Halanych <sup>11,\*</sup>, and Daniel L. Distel <sup>2,\*</sup>

<sup>1</sup>Institute of Marine Science and Technology, Shandong University, Qingdao 266237, China

<sup>2</sup>Ocean Genome Legacy Center, Department of Marine and Environmental Science, Northeastern University, Nahant, Massachusetts 01908, USA

<sup>3</sup>Marine Biology and Ecology Research Centre, School of Biological and Marine Sciences, University of Plymouth, Plymouth PL4 8AA, United Kingdom

<sup>4</sup>Department of Natural Sciences, University of South Carolina Beaufort, 801 Carteret Street, Beaufort, South Carolina 29902, USA

<sup>5</sup>Division of Invertebrate Zoology, American Museum of Natural History, Central Park West at 79th Street, New York, New York 10024, USA

<sup>6</sup>Departamento de Oceanografia, Universidade Federal do Espírito Santo, Vitória-ES, Brazil

<sup>7</sup>Drug Research and Development Center, Department of Physiology and Pharmacology, Federal University of Ceará, Ceará, Brazil

<sup>8</sup>Department of Medicinal Chemistry, University of Utah, Salt Lake City, Utah, USA

<sup>9</sup>Departamento de Oceanografia Biológica, Instituto Oceanográfico da Universidade de São Paulo, São Paulo, SP, Brazil

<sup>10</sup>Department of Oceanography, University of Hawai'i at Mānoa, Hawaii, USA

<sup>11</sup>Center for Marine Science, University of North Carolina Wilmington, North Carolina, USA

\*Corresponding authors: E-mails: d.distel@northeastern.edu (D.L.D.); halanychk@uncw.edu (K.M.H.).

Accepted: 05 June 2022

## Abstract

The bivalve families Teredinidae and Xylophagaidae include voracious consumers of wood in shallow-water and deep-water marine environments, respectively. The taxa are sister clades whose members consume wood as food with the aid of intracellular cellulolytic endosymbionts housed in their gills. This combination of adaptations is found in no other group of animals and was likely present in the common ancestor of both families. Despite these commonalities, the two families have followed dramatically different evolutionary paths with respect to anatomy, life history, and distribution. Here, we present 42 new mitochondrial genome sequences from Teredinidae and Xylophagaidae and show that distinct trajectories have also occurred in the evolution and organization of their mitochondrial genomes. Teredinidae display significantly greater rates of amino acid substitution but absolute conservation of protein-coding gene order, whereas Xylophagaidae display significantly less amino acid change but have undergone numerous and diverse changes in genome organization since their divergence from a common ancestor. As with many bivalves, these mitochondrial genomes encode 2 ribosomal RNAs, 12 protein-coding genes, and 22 tRNAs; *atp8* was not detected. We further show that their phylogeny, as inferred from amino acid sequences of 12 concatenated mitochondrial protein-coding genes, is largely congruent with those inferred from their nuclear genomes based on 18S and 28S ribosomal RNA sequences. Our results provide a robust phylogenetic framework to explore the tempo

© The Author(s) 2022. Published by Oxford University Press on behalf of Society for Molecular Biology and Evolution.

This is an Open Access article distributed under the terms of the Creative Commons Attribution License (<https://creativecommons.org/licenses/by/4.0/>), which permits unrestricted reuse, distribution, and reproduction in any medium, provided the original work is properly cited.

and mode of mitochondrial genome evolution and offer directions for future phylogenetic and taxonomic studies of wood-boring bivalves.

**Key words:** marine woodborers, shipworm, xylotrophy, xylophagy, mitochondrial gene order, deep-sea.

## Significance

Among metazoans, bivalves display unusual variation in mitochondrial genome evolution, organization, and inheritance, but the factors that influence this evolutionary lability are poorly understood. Here, we present 42 new mitochondrial genome sequences from bivalve sister clades that despite their close phylogenetic relationship and uniquely shared wood-feeding habits, differ dramatically in morphology, life history, and distribution. We show that these differences are correlated with equally dramatic differences in tempo and mode of mitochondrial genome evolution, laying the groundwork for improved understanding of the complex evolutionary interactions between marine organisms, environments, and mitochondrial genomes.

## Introduction

Teredinidae and Xylophagidae (fig. 1) are the sole members of the molluscan class Bivalvia capable of consuming wood as food, or xylotrophy. Indeed, all but two species of Teredinidae and all species of Xylophagidae burrow nearly exclusively in wood or woody plant materials and are thought to utilize vascular plant cell wall material (lignocellulose) as a substantial source of dietary carbon (Distel 2003; Turner 1967; Voight 2015; Nishimoto et al. 2021). Moreover, all members of both families are thought to harbor intracellular cellulolytic gammaproteobacteria in their gill tissues, a feature that is unique among all animals. Teredinidae are commonly called “shipworms” because of their worm-like morphology and historical legacy of destroying unprotected wooden ships. Even today, shipworms account for billions of US dollars in damages to man-made wooden structures in marine and brackish environments (Distel 2003). Shipworms were well-known to the earliest seafarers and have altered the course of human civilizations (Stearns 1886; Distel 2003), having been implicated in the defeat of the Spanish Armada and in the disastrous conclusion of the fourth voyage of Christopher Columbus (Raya et al. 2015). Similarly, the burrowing activity of xylophagids is reported to have caused the failure of early submarine telecommunications cables by damaging their insulating sheaths (Jeffries 1861; Parkes and Keeble 2016) and even today remains a concern for the design of subsea umbilicals (Parkes and Keeble 2016). Despite these negative impacts, wood-boring bivalves also play beneficial economic and ecological roles in many marine environments by converting recalcitrant wood into animal biomass that is more easily consumed by a wide range of organisms (Petra Pop et al. 2017; Cragg et al. 2020). Shipworms are also considered a delicacy in several traditional cuisines (Turner 1971) and have been proposed to have economic potential as a shellfishery (Willer and Aldridge 2020).

Despite their common xylotrophic lifestyle, these two families inhabit distinct and nearly nonoverlapping distributions wherein they are exposed to very different environmental conditions. Teredinidae are common in tropical and temperate waters but are largely absent from polar zones. With a few notable exceptions, for example (Velasquez and Shipway 2018), they occur at shallow depths, typically less than 200 m. They are most common in near-shore and intertidal, mangrove, estuarine, and coastal riparian environments where floating and deposited driftwood and submerged roots and branches provide abundant and consistent sources of food and shelter. Within these environments many teredinids experience and tolerate broad ranges of salinity and temperature with strong seasonal, diurnal, and weather-driven variation (Voight 2015). Because they often inhabit floating wood and wood deposited in the intertidal zone, they may frequently experience prolonged periods of air exposure due to tidal recession. They survive such exposure by sealing their burrows, which are lined with an impervious shell-like calcareous material, using a paired set of calcareous plates called pallets. Pallets and shell-lined burrows are common to Teredinidae but are absent in Xylophagidae, with the exception of the genus *Xyloredo* in which the distal end of the burrow is lined (Voight et al. 2019). Although these adaptations may prevent desiccation and death during atmospheric exposure, they introduce other significant stresses such as extended periods of anaerobiosis and accumulation of metabolic waste.

Xylophagidae, on the other hand, are found in sunken wood on the sea floor most commonly at depths greater than 150–200 m, with a few species coming into shallow water in boreal and high latitudes (Voight 2015; Romano et al. 2020). Typically, they are exposed to the consistent low temperatures and narrow salinity ranges characteristic of deep-sea environments and experience substantially less seasonal diurnal, and storm driven variation than is

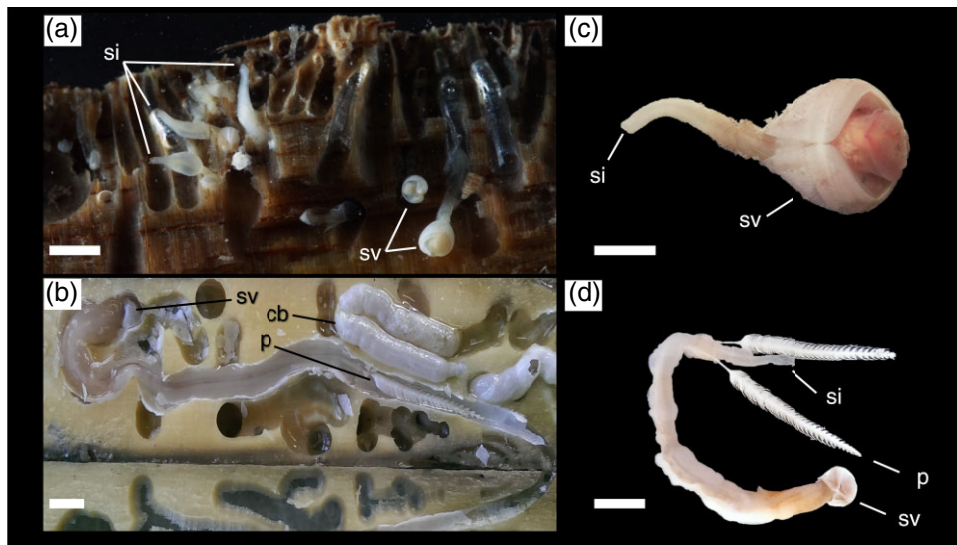

**Fig. 1.**—Wood-boring bivalves of the families Teredinidae and Xylophagidae. (a) Xylophagids and (b) Teredinids within their burrows in wood; (c) xylophagaid (*Xylophaga dorsalis*) and (d) teredinid (*Bankia setacea*) removed from their wooden burrows. Note the dramatic differences in morphology. cb, calcareous burrow lining; p, pallet; si, siphon; sv, shell valve. Scale bars for (A)–(D) = 1 cm.

commonly encountered by teredinids in shallow water. With few exceptions, for example (Jayachandran et al. 2022), Xylophagidae have not been reported to inhabit floating wood and have only rarely been observed within the intertidal zone (Turner 2002; Voight 2016). Thus, they are typically not exposed to the atmosphere, lack adaptations for sealing their burrows, and do not typically experience the types of anaerobic and metabolic stresses encountered by Teredinidae during prolonged periods of burrow closure.

The two families also differ with respect to reproductive strategies. Although little is known about the reproductive biology of Xylophagidae, most are thought to be broadcast spawners with planktotrophic larvae. Although many species were once thought to brood their young, small specimens commonly found within the female's burrows have more recently been shown to be dwarf males (Haga and Kase 2013) rather than larvae. Male dwarfism is often associated with sparse food availability and spatial limitation for growth (Haga and Kase 2013), features consistent with deep-water environments where wood, which serves both as food and habitat for Xylophagidae, is scarce. In contrast, Teredinidae employ a wide range of reproductive strategies, including pseudocopulation (Shipway et al. 2020), broadcast spawning with maximized production of gametes, and larval brooding with fewer offspring and extended parental care. In most cases, these are adaptations suited to rapid utilization of a comparatively abundant but patchily distributed wood supply (MacIntosh et al. 2014). Male dwarfism is found in only one described teredinid species, *Zachsia zenkewitschi*, which inhabits spatially restrictive seagrass rhizomes (Shipway et al. 2016).

Finally, the two families differ substantially in anatomy and morphology. For the most part, Xylophagidae conform to a typical bivalve body plan, wherein the internal organs are located between the anterior and posterior adductor muscles and the entire body, with the exception of the siphons in some cases, can be retracted between the shells (Voight 2015). In contrast, Teredinidae are among the most morphologically divergent bivalves (Turner 1966). During development, the body elongates and the heart, gills, gonads, and a substantial portion of the digestive system assume a position posterior to the posterior adductor muscle, bringing them permanently outside the protection of the valves.

Despite these substantial differences (summarized in fig. 2), investigations based on 18S and 28S rRNA sequences support Teredinidae and Xylophagidae as sister families (Voight 2015; Voight et al. 2019; Romano et al. 2020), agreeing with the earlier conclusions of Purchon (Purchon 1941) and supplanting the later placement of the deep-sea wood borers as a subfamily of Pholadidae (Turner 1967, 2002). Although no formal taxonomic revision has yet been published, this view has gained wide acceptance in the literature (Voight 2015; Voight et al. 2019; Romano et al. 2020). Nonetheless, phylogenetic relationships within the two families remain unresolved.

Mitochondrial genome data have proven useful in resolving phylogenetic relationships across a wide range of metazoans, for example (Miya et al. 2001; Osigus et al. 2013; Li, Kocot, et al. 2015) including mollusks, for example (Grande et al. 2008; Mikkelsen et al. 2018; Kong et al. 2020). Although, mollusks are among the most variable of bilaterian animals with respect to mitochondrial

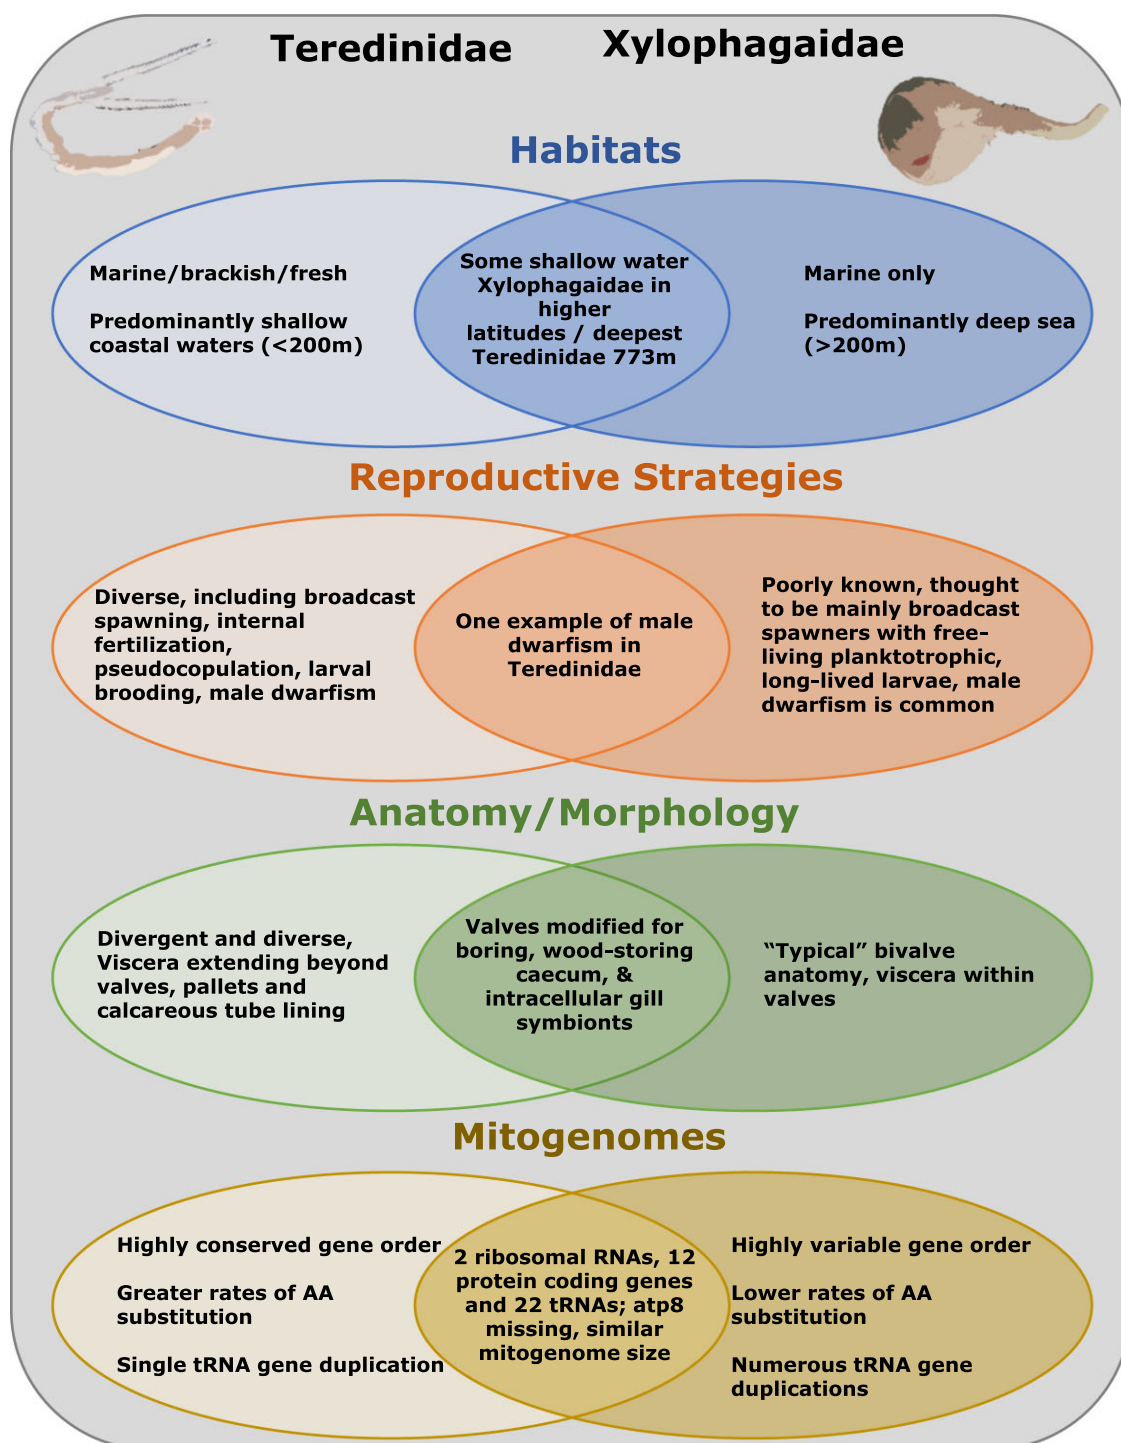

**FIG. 2.**—Graphic comparison of tereidinid and xylophagaid habitat preferences, reproductive strategies, anatomy, and mitochondrial genome characteristics.

genome size and organization (Piccinini et al. 2021), most still conform to the canonical bilaterian mitochondrial genome complement of 37 genes including 22 tRNAs, 12–13 protein-coding genes, and 2 rRNA genes. ATP synthase subunit 8 is not detected and may be absent in a number

of bivalve taxa (Ghiselli et al. 2021). The most obvious variations in length are due to the presence of noncoding regions (Formaggioni et al. 2021), which, in some bivalves, account for mitochondrial genomes 2–3 times of that of the typical 15–17 kb bilaterian size (Smith and Snyder



2007; Williams et al. 2017; Kong et al. 2020). Gene order, orientation, and location with respect to the heavy and light strands also show considerable variation in mollusks (Piccinini et al. 2021). However, the degree of variation in genome length, gene order, and strandedness, as well as nucleotide composition, appears to be largely clade-specific. In the case of the order Myida, which includes economically important invasive and wood-boring species, genomic resources are still scarce in comparison to other major bivalve clades. Prior to this study, only one complete mitochondrial genome assembly had been published for Myida in the NCBI Reference Sequence Database (O'Leary et al. 2016; Wilson et al. 2016) with no representation of the superfamily Pholadomyoidea, which includes most wood-boring species.

Because Xylophagidae and Teredinidae present an unusual combination of recent common ancestry and unique shared feeding strategy, juxtaposed with profound differences in morphology, reproductive strategies, life history, and bathymetric distribution, we ask whether similarly stark contrasts are also observed in their mitochondrial genome organization and evolution. To this end, we explore the mitochondrial genomes from a variety of taxa representing both Teredinidae and Xylophagidae.

## Results and Discussion

Mitochondrial genome sequences were determined for 42 bivalve specimens, including 26 Teredinidae from 15 locations and 16 Xylophagidae from 8 locations (table 1). A single unique mitochondrial genome was recovered from each specimen examined. Although no evidence of distinct sex-specific mitochondrial lineages was detected, for example, doubly uniparental inheritance, this cannot be definitively ruled out as sex of individual specimens was not determined and reproductive organs were not specifically sampled.

All mitochondrial genomes described herein contain, at minimum, 2 ribosomal RNA (rRNA) genes, 22 tRNA genes, and 12 of the 13 canonical protein-coding genes commonly present in animal mitogenomes; *atp8* was not detected. All genes are encoded on the same strand and share the same orientation. The genomes range in size from 14,450 to 18,624 bp (table 2), similar to most bilaterian mtDNA genomes. No significant difference was detected in mitochondrial genome size between the two families. Much of the observed length variation is associated with non-coding regions, which on average comprised a significantly larger fraction of total mitochondrial genome in Xylophagidae than in Teredinidae (supplementary fig. S1, Supplementary Material online). However, significant differences were observed in GC-content and in evolutionary rates between teredinids and xylophagids using paired

*t*-tests with *P* values adjusted by Bonferroni methods (fig. 3).

## Phylogeny

All three modeling approaches (single-site homogeneous model of unpartitioned supermatrix (fig. 4), site-heterogeneous C20 model (supplementary fig. S4, Supplementary Material online), and data-partitioning (supplementary fig. S5, Supplementary Material online), produced largely congruent results, with exception of the phylogenetic positions of *Teredothyra matocotana* and *Nototeredo knoxi* for which bootstrap support was low in all three analyses. The site homogeneous model applied to the unpartitioned supermatrix produced a tree most similar to previously published phylogenetic analyses based on large (28S) and small (18S) subunit nuclear-encoded rRNA sequences and the cytochrome c oxidase I gene (Distel et al. 2011; Voight et al. 2019; Romano et al. 2020). For example, in agreement with previous reports, the tree presented in figure 4 supports the nonmonophyly of the Teredinidae subfamilies Teredininae and Bankiinae, showing *Lyrodus* and *Teredo* (Teredininae) nested within Bankiinae, which is in turn nested within a clade containing *Neoteredo* and *Bactronophorus* (Teredininae). Additionally, in agreement with previously published results, these analyses support the monophyly of *Xyloredo* and of *Xylophaga* as well as the divergence between these and *Xylonora*, a genus recently erected to remedy the nonmonophyly of *Xylophaga* (Voight et al. 2019; Romano et al. 2020). However, the monophyly of *Xylonora* is not well supported in our analyses. The most notable difference between the analyses presented here and those reported previously (Distel et al. 2011; Borges et al. 2022) is the basal position of the node connecting *Kuphus* (Kuphiinae) to other Teredinidae, which was previously reported to be nested within Teredininae. As *Kuphus* is arguably the most morphologically derived and physiologically distinct member of Teredinidae, as well as one of only two members of the family identified to date that harbor chemoautotrophic endosymbionts (Distel et al. 2017; Altamia et al. 2020), the phylogenetic position of Kuphiinae is important with respect to understanding the origins of symbiosis in teredinids. The tree is also consistent with the previously reported sister relationship between the families Teredinidae and Xylophagidae (Distel et al. 2011). We caution, however, that the analyses presented here lack sufficient taxonomic representation both within the two families and among their closest relatives to confidently resolve the basal branching order of either Teredinidae or Xylophagidae, or to provide additional support for the proposed sister relationship between these taxa. Based on the remarkable economic impact, ecological importance, historical influence, and potential biotechnological and medicinal

**Table 1**

Information of Sample Collection Location

|                                      | Specimen                                     | Collection location                                                | Depth (m)          | Coordinates           |
|--------------------------------------|----------------------------------------------|--------------------------------------------------------------------|--------------------|-----------------------|
| <b>Teredinidae</b>                   | <i>Bactronophorus thoracites</i> [PMS-2771X] | Infanta, Quezon, Philippines                                       | <2                 | 14.68367, 121.6369    |
|                                      | <i>Bactronophorus thoracites</i> [PMS-2849Y] | Infanta, Quezon, Philippines                                       | <2                 | 14.68367, 121.6369    |
|                                      | <i>Bankia</i> sp. [TBF03]                    | Pacoti River Environmental Protection Area, Ceara State, Brazil    | <2                 | -3.84311, -38.42269   |
|                                      | <i>Bankia</i> sp. [TBF05]                    | Pacoti River Environmental Protection Area, Ceara State, Brazil    | <2                 | -3.84311, -38.42269   |
|                                      | <i>Bankia gouldi</i> [5209S]                 | Mobile Bay, Gulf of Mexico, Alabama, USA                           | 20                 | 30.24867, -88.07333   |
|                                      | <i>Bankia setacea</i> [sp 1]                 | Puget Sound, Washington, USA                                       | <20                | 47.85072, -122.33843  |
|                                      | <i>Bankia setacea</i> [sp 2]                 | Puget Sound, Washington, USA                                       | <20                | 47.85072, -122.33843  |
|                                      | <i>Bankia setacea</i> [sp 3]                 | Puget Sound, Washington, USA                                       | <20                | 47.85072, -122.33843  |
|                                      | <i>Bankia setacea</i> [sp 4]                 | Puget Sound, Washington, USA                                       | <20                | 47.85072, -122.33843  |
|                                      | <i>Bankia setacea</i> [sp 5]                 | Puget Sound, Washington, USA                                       | <20                | 47.85072, -122.33843  |
|                                      | <i>Dicyathifer mannij</i> [PMS-2772P]        | Infanta, Quezon, Philippines                                       | <2                 | 14.68367, 121.6369    |
|                                      | <i>Dicyathifer mannij</i> [PMS-2858W]        | Infanta, Quezon, Philippines                                       | <2                 | 14.68367, 121.6369    |
|                                      | <i>Dicyathifer mannij</i> [PMS-3770U]        | Infanta, Quezon, Philippines                                       | <2                 | 14.68367, 121.6369    |
|                                      | <i>Kuphus polythalamius</i> [PMS-2132W]      | Kalamansig, Sultan Kudarat, Philippines                            | <3                 | 6.53631, 124.04836    |
|                                      | <i>Kuphus polythalamius</i> [PMS-2133X]      | Kalamansig, Sultan Kudarat, Philippines                            | <3                 | 6.53631, 124.04836    |
|                                      | <i>Kuphus</i> sp. [PMS-3700M]                | Mabini, Batangas, Philippines                                      | <2                 | 13.75843, 120.92586   |
|                                      | <i>Lithoredo abatanica</i> [PMS-4316M sp 1]  | Abatan River, Bohol, Philippines                                   | <2                 | 9.76558, 123.9442     |
|                                      | <i>Lithoredo abatanica</i> [PMS-4316M sp 2]  | Abatan River, Bohol, Philippines                                   | <2                 | 9.765583, 123.9442    |
|                                      | <i>Lyrodus</i> sp. FLG0                      | Indian River Lagoon, Merritt Island, Florida, USA                  | <1                 | 28.4060, 80.6603      |
|                                      | <i>Neoteredo reynei</i>                      | Coroa Grande Mangrove - Sepetiba Bay, Rio de Janeiro State, Brazil | <2                 | -22.90816, -43.87563  |
|                                      | <i>Nototeredo knoxi</i> [5147X]              | Mobile Bay, Gulf of Mexico, Alabama, USA                           | 20                 | 30.24867, -88.07333   |
|                                      | <i>Teredo</i> sp. [TBF02]                    | Pacoti River Environmental Protection Area, Ceara State, Brazil    | <2                 | -3.84311, -38.42269   |
|                                      | <i>Teredo</i> sp. [TBF07]                    | Pacoti River Environmental Protection Area, Ceara State, Brazil    | <2                 | -3.84311, -38.42269   |
|                                      | <i>Teredo</i> sp. [TBF09]                    | Pacoti River Environmental Protection Area, Ceara State, Brazil    | <2                 | -3.84311, -38.42269   |
|                                      | <i>Teredo bartschi</i>                       | Coos Bay, Oregon, USA                                              | <2                 | 43.325803, -124.20622 |
|                                      | <i>Teredothyra matocotana</i> [5007K]        | Mobile Bay, Gulf of Mexico, Alabama, USA                           | 20                 | 30.24867, -88.07333   |
|                                      | <b>Xylophagidae</b>                          | <i>Xylonora corona</i>                                             | BOWL3 (NE Pacific) | ~3,000                |
| <i>Xylonora zierenbergi</i>          |                                              | BOWL3 (NE Pacific)                                                 | ~3,000             | 47.27, -127.59283     |
| <i>Xylophaga dorsalis</i>            |                                              | Sørfjorden near Nygård, Norway                                     | 210                | 60.48191, 5.41775     |
| <i>Xylophaga oregona</i> [Bv346 11E] |                                              | BOWL6 (NE Pacific)                                                 | 1,605              | 43.90866, -125.1715   |
| <i>Xylophaga oregona</i> [Bv346 18E] |                                              | BOWL6 (NE Pacific)                                                 | 1,605              | 43.90866, -125.1715   |
| <i>Xylophaga oregona</i> [Bv352]     |                                              | BOWL2 (NE Pacific)                                                 | 1,596              | 47.957667, -126.0365  |
| <i>Xylophaga oregona</i> [Bv354]     |                                              | BOWL2 (NE Pacific)                                                 | 1,596              | 47.957667, -126.0365  |
| <i>Xylophaga washingtona</i> [Dock3] |                                              | Friday Harbor Dock, Washington, USA                                | ~20                | 48.54485, -123.01231  |
| <i>Xylophaga washingtona</i> [Dock5] |                                              | Friday Harbor Dock, Washington, USA                                | ~20                | 48.54485, -123.01231  |
| <i>Xylophagidae</i> sp. [E23]        |                                              | Santos Basin (Brazil)                                              | 1,508              | -25.90111, -45.035833 |
| <i>Xylophagidae</i> sp. [sp1 E81]    |                                              | Santos Basin (Brazil)                                              | 1,508              | -25.90111, -45.035833 |
| <i>Xyloredo nooi</i> [E25]           |                                              | Espirito Santo Basin (Brazil)                                      | 1,500              | -21.45013, -39.8965   |
| <i>Xyloredo nooi</i> [E26]           |                                              | Espirito Santo Basin (Brazil)                                      | 1,500              | -21.45013, -39.8965   |
| <i>Xyloredo nooi</i> [E77]           |                                              | Espirito Santo Basin (Brazil)                                      | 1,500              | -21.45013, -39.8965   |
| <i>Xyloredo</i> sp. [E88]            |                                              | Santos Basin (Brazil)                                              | 3,358              | -28.03638, -43.53833  |
| <i>Xyloredo</i> sp. [E89]            |                                              | Santos Basin (Brazil)                                              | 3,358              | -28.03638, -43.53833  |

relevance of these organisms, future studies should seek to analyze mitogenomes across a broader taxonomic range of both families.

### Gene Order and Copy Number

Surprisingly, despite their close phylogenetic relationship, the two families differ dramatically with respect to conservation of gene order. Among all Teredinidae examined, the order of protein-coding genes in mitochondrial genomes is conserved (fig. 4), but variation was observed among tRNA positions (supplementary fig. S6, Supplementary Material online). In 7 of 14 taxa, 1–4 tRNA genes (*trn L1, M, N, Q, R, and V*) differ in position from the consensus order. This is consistent with the observation that rearrangements and duplications involving tRNAs occur more frequently than those observed among protein-coding genes (Ghiselli et al. 2021). Interestingly, in one species, *Neoteredo reynei*, there is an apparent duplication of *trnW* and its consensus neighbor, *cox3*. E values and quality scores determined by MITOS2 suggest the degradation of one copy of each duplicated gene.

In sharp contrast, six distinct and highly divergent patterns of protein-coding gene order were observed among eight putative xylophagaid species examined (fig. 4). In addition, variations in tRNA gene order are far more common in Xylophagaidae than in Teredinidae, as are gene duplications (supplementary fig. S6, Supplementary Material online). Indeed, differences in tRNA gene order were apparent between all putative species examined and were observed even within a single nominal species, *Xylophaga oregona*. Apparent tRNA gene duplications were observed in three of eight putative species examined, involving *trnS1, H, D, Y, Q, and M*, with putative copy numbers ranging from 2 to 5 per genome. Similarly multiple tRNA gene copies have been reported on other bivalve mitochondrial genomes, for example, in bathymodiolin mussels (Zhang et al. 2021). Moreover, in one putative species, represented by xylophagaid specimens E23 and E81, there is an apparent tandem duplication of the *rrnS* and *trnM* genes. Although tandem duplication is thought to play an important role in mitochondrial genome rearrangement, few animal mitochondrial genomes contain duplicated copies of protein-coding and ribosomal genes, likely due to selection for the maintenance of cytonuclear stoichiometry (Ghiselli et al. 2021). Thus, the evidence of gene duplications presented here warrant further investigation.

Interestingly, among all pairwise comparisons within and between the two families, the most similar arrangements of mitochondrial protein-coding genes are observed between all Teredinidae and *Xylophaga washingtona*, *X. oregona* and three of five *Xyloredo* mitogenomes examined (fig. 4). These two protein-coding gene arrangements differ only by the position of the *cox2* gene, and each can be

transformed into the other with a single transposition. This observation, combined with the complete conservation of protein-coding gene order in Teredinidae, suggest the parsimonious conclusion that a similar protein-coding gene arrangement likely occurred in the most recent common ancestor of the two families. Based on this assumption, credible scenarios for evolution of gene order can be inferred by analysis of common intervals using Crex (Bernt et al. 2007). For simplicity, the scenario depicted in figure 4 considers only protein-coding gene order and proposes an ancestral gene order identical to that found in all Teredinidae. Although resolving the complex history of mitochondrial gene rearrangement in wood-eating taxa requires additional taxon sampling and is beyond the scope of this investigation, the scenario presented in figure 4 serves to demonstrate the large number and diverse types of rearrangements required to reconcile the numerous and divergent gene orders observed in this investigation. Notably, protein-coding gene rearrangements are found even among closely related members of the genus *Xyloredo*, with some members sharing the same gene order as *X. washingtona* and *X. oregona* and others displaying a highly divergent gene order.

In addition to greater conservation of gene order, species of Teredinidae also displayed greater conservation with respect to the predicted locations of replication origins (table 3). Within Teredinidae, the predicted locations of both the heavy-strand origins (OriH) and light-strand origins (OriL) were conserved with respect to protein-coding genes but not with respect to tRNA genes. In all species the predicted OriH was located between *cob* and *rrnL*. However, the predicted OriH locations differed with respect to the locations of *trnM* and *trnC* which, in all but one species also fall between these same protein-coding genes. The predicted OriH in all but three taxa (*Bactronophorus thoracities*, *Dicyathifer mannii* and *Lithoredo abatanica*), falls downstream of *cob* but precedes *trnM* and *trnC*. In *B. thoracities*, *trnM* is transposed to a position upstream of *cob* and the OriH falls between *cob* and *trnC*. In *L. abatanica* the predicted OriH falls between *trnM* and *trnC*, and in *D. mannii* it falls between *trnM* and *rrnL*. Similarly, the predicted light-strand origin (OriL) was located between *cox1* and *nad4* in all species but differed with respect to the position of *trnT*, which also falls between these two protein-coding genes. The OriL is predicted to fall in the *cox1-trnT* IGR in all teredinid mitogenomes except *D. mannii* and *L. abatanica* in which it falls downstream of *trnT*. Thus, the locations of both origins of replication appear to be invariant with respect to protein-coding genes but variable with respect to tRNA encoding genes.

In contrast, among the eight species Xylophagaidae examined, six distinct locations were predicted for the OriH with respect to flanking protein-coding genes. Interestingly, among xylophagaid species that share the

**Table 2**

Genome Statistics

|                                      | Specimen                                     | Genome size (bp)       | GC%    | Sequence platform                       | GenBank accession # |
|--------------------------------------|----------------------------------------------|------------------------|--------|-----------------------------------------|---------------------|
| <b>Teredinidae</b>                   | <i>Bankia setacea</i> [sp 1]                 | 16,986                 | 39.8   | Illumina, 454 GS FLX Titanium           | OM910805            |
|                                      | <i>Bankia setacea</i> [sp 2]                 | 16,879                 | 39.9   |                                         | OM910806            |
|                                      | <i>Bankia setacea</i> [sp 3]                 | 17,025                 | 39.7   |                                         | OM910807            |
|                                      | <i>Bankia setacea</i> [sp 4]                 | 17,105                 | 39.8   |                                         | OM910808            |
|                                      | <i>Bankia setacea</i> [sp 5]                 | 17,358                 | 40.0   |                                         | OM910809            |
|                                      | <i>Bankia</i> sp. [TBF03]                    | 16,411                 | 41.4   | Illumina MiSeq                          | OM910810            |
|                                      | <i>Bankia</i> sp. [TBF05]                    | 16,766                 | 41.4   |                                         | OM910811            |
|                                      | <i>Neoteredo reynei</i>                      | 18,035                 | 41.5   |                                         | OM910821            |
|                                      | <i>Teredo</i> sp. [TBF02]                    | 17,016                 | 41.7   |                                         | OM910824            |
|                                      | <i>Teredo</i> sp. [TBF07]                    | 17,022                 | 41.7   |                                         | OM910825            |
|                                      | <i>Teredo</i> sp. [TBF09]                    | 17,028                 | 41.7   |                                         | OM910826            |
|                                      | <i>Teredo bartschi</i>                       | 16,962                 | 39.9   | Illumina HiSeq X<br>Illumina HiSeq 2000 | OM910823            |
|                                      | <i>Bactronophorus thoracites</i> [PMS-2771X] | 16,562                 | 43.1   |                                         | OM910802            |
|                                      | <i>Bactronophorus thoracites</i> [PMS-2849Y] | 16,562                 | 43.1   |                                         | OM910803            |
|                                      | <i>Bankia gouldi</i> [5209S]                 | 16,795                 | 39.0   |                                         | OM910804            |
|                                      | <i>Dicyathifer mannii</i> [PMS-2772P]        | 17,176                 | 37.9   |                                         | OM910812            |
|                                      | <i>Dicyathifer mannii</i> [PMS-2858W]        | 17,176                 | 37.9   |                                         | OM910813            |
|                                      | <i>Dicyathifer mannii</i> [PMS-3770U]        | 17,177                 | 37.9   |                                         | OM910814            |
|                                      | <i>Kuphus polythalamius</i> [PMS-2132W]      | 18,094                 | 42.4   |                                         | OM910815            |
|                                      | <i>Kuphus polythalamius</i> [PMS-2133X]      | 18,098                 | 42.3   |                                         | OM910816            |
|                                      | <i>Kuphus polythalamius</i> [PMS-3700M]      | 18,578                 | 42.6   |                                         | OM910817            |
|                                      | <i>Lithoredo abatanica</i> [PMS-4316M sp 1]  | 16,084                 | 42.3   |                                         | OM910818            |
|                                      | <i>Lithoredo abatanica</i> [PMS-4316M sp 2]  | 16,074                 | 42.3   |                                         | OM910819            |
|                                      | <i>Lyrodus</i> sp. [FL G0]                   | 17,907                 | 37.7   |                                         | OM910820            |
|                                      | <i>Nototeredo knoxi</i> [5147X]              | 18,431                 | 39.7   |                                         | OM910822            |
|                                      | <i>Teredothyra matocotana</i> [5007K]        | 17,364                 | 39.7   |                                         | OM910827            |
|                                      | <b>Xylophagidae</b>                          | <i>Xylonora corona</i> | 15,083 | 42.9                                    | Illumina HiSeq 2000 |
| <i>Xylonora zierenbergi</i>          |                                              | 14,450                 | 43.8   | OM910829                                |                     |
| <i>Xylophaga dorsalis</i>            |                                              | 16,787                 | 32.8   | OM910830                                |                     |
| <i>Xylophaga oregona</i> [Bv346 11E] |                                              | 18,220                 | 40.2   | OM910831                                |                     |
| <i>Xylophaga oregona</i> [Bv346 18E] |                                              | 17,883                 | 40.2   | OM910832                                |                     |
| <i>Xylophaga oregona</i> [Bv352]     |                                              | 18,477                 | 40.4   | OM910833                                |                     |
| <i>Xylophaga oregona</i> [Bv354]     |                                              | 18,477                 | 40.4   | OM910834                                |                     |
| <i>Xylophaga washingtona</i> [Dock3] |                                              | 18,624                 | 40.0   | OM910835                                |                     |
| <i>Xylophaga washingtona</i> [Dock5] |                                              | 18,599                 | 40.0   | OM910836                                |                     |
| <i>Xylophagidae</i> sp. [E23]        |                                              | 17,410                 | 38.7   | OM910837                                |                     |
| <i>Xylophagidae</i> sp. [sp1 E81]    |                                              | 16,921                 | 38.3   | OM910838                                |                     |
| <i>Xyloredo nooi</i> [E25]           |                                              | 17,619                 | 37.8   | OM910839                                |                     |
| <i>Xyloredo nooi</i> [E26]           |                                              | 18,013                 | 38.1   | OM910840                                |                     |
| <i>Xyloredo nooi</i> [E77]           |                                              | 17,322                 | 37.7   | OM910841                                |                     |
| <i>Xyloredo</i> sp. [E88]            |                                              | 16,184                 | 32.1   | OM910842                                |                     |
| <i>Xyloredo</i> sp. [E89]            |                                              | 16,416                 | 32.4   | OM910843                                |                     |

same protein-coding gene order (*Xylophaga oregona*, *X. washingtona* and *Xyloredo nooi*) the predicted OriH locations were conserved with respect to flanking protein-coding genes. The position of OriL could not be confidently predicted in the examined xylophagid species.

### Amino Acid Substitution Rates

In contrast to the rapid evolution of gene order in Xylophagidae as compared Teredinidae, the estimated

average rate of amino acid substitution (1.53 substitutions/site), determined as a function of tip-to-root branch lengths in the concatenated supermatrix tree (figure 4), is significantly lower ( $P=6.7 \times 10^{-9}$ ,  $t$ -test) than in Teredinidae (2.18 substitutions/site; fig. 3). This constitutes a difference of approximately 1.4-fold. The higher rates of amino acid substitution in Teredinidae may be tied to adaptation to anaerobic stress. Unlike xylophagids which are adapted to deep-sea environments where oxygen concentrations are comparatively consistent



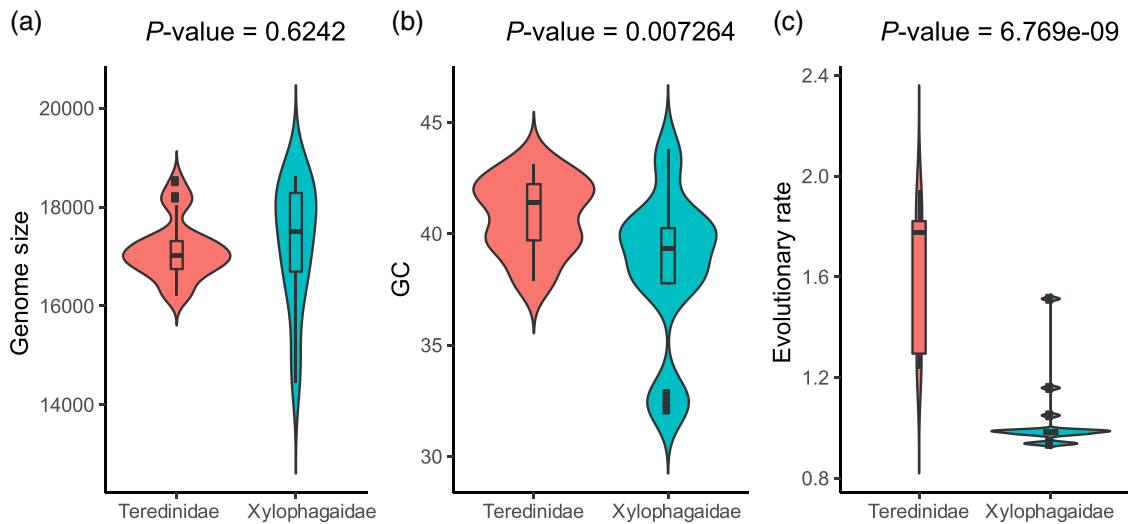

**FIG. 3.**—Violin plots comparing genome size, GC-content, and evolutionary (amino acid substitution) rate between Teredinidae and Xylophagidae. Statistical significance of differences between Teredinidae and Xylophagidae with respect to each genome property was evaluated using paired *t*-tests with *P* values adjusted by Bonferroni methods (*P* values shown above). (a) Genome size; (b) GC content; and (c) evolutionary (amino acid substitution) rates as measured by the tip-to-root distance. Note that GC-content and amino acid substitution rate, but not genome size, are significantly different at a *P* value threshold of <0.01.

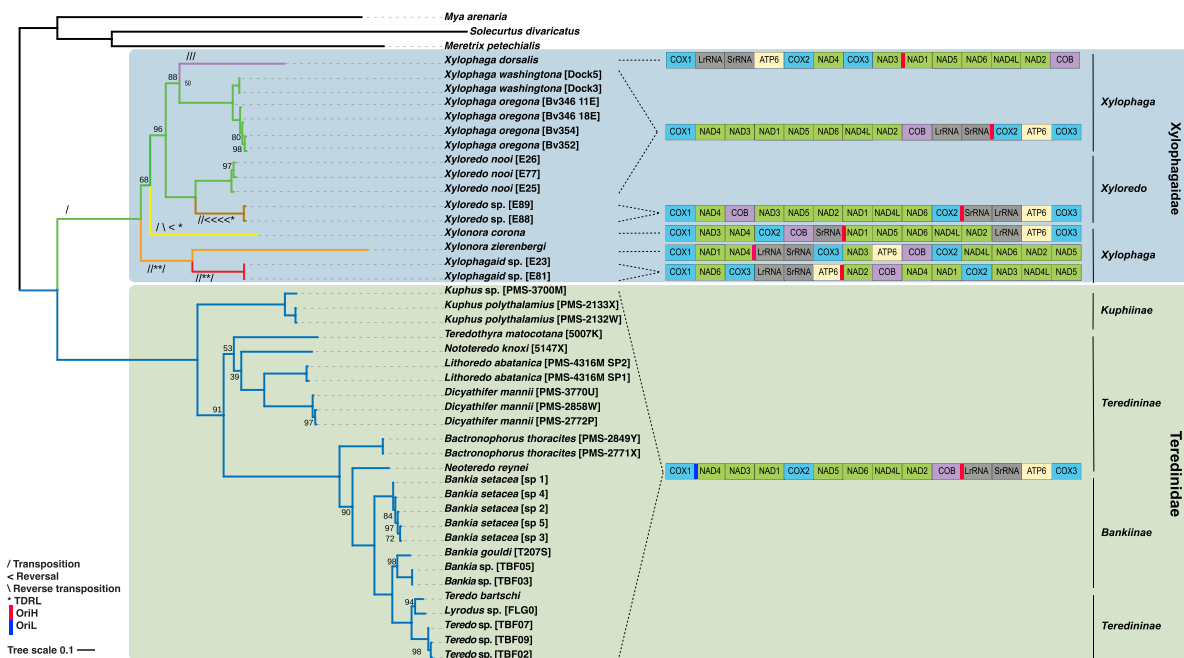

**FIG. 4.**—Phylogenetic relationships and variation in mitochondrial gene arrangement among species of Xylophagidae and Teredinidae. Phylogenetic tree inferred by ML (single-site homogeneous model, unpartitioned, IQ-Tree 1.6.7) based on 4,135 unambiguously aligned amino acid positions selected using Gblocks from an alignment of 12 concatenated mitochondrial protein-coding genes. Bootstrap proportions, less than 100 are indicated at the nodes; where no numerical value is indicated, the bootstrap proportion = 100. Protein-coding gene arrangements associated with each species are depicted on the right. Putative origins of replication are indicated by thick vertical bars. A proposed scenario for the evolutionary history of gene rearrangement, determined by analysis of common intervals using CReX, is superimposed on the phylogenetic tree with branches color-coded according to extant and hypothetical ancestral gene orders. Symbols indicate rearrangements required to transform each hypothetical ancestral gene order to the order observed in the extant species. “/” indicates transposition, “\” indicates reverse transposition, “<” indicates reversal, “\*” indicates tandem duplication with random loss (TDRL).

Downloaded from https://academic.oup.com/gbe/article/14/6/evac089/6609978 by guest on 23 April 2024

**Table 3**

Hypothesized Origins of Replication in Teredinid and Xylophagaid Mitogenomes as Revealed by a DNAWalk Analysis

|                                  | OriH           | OriL          |
|----------------------------------|----------------|---------------|
| <b>Teredinidae</b>               |                |               |
| <i>Bactronophorus thoracites</i> | cob-trnM IGR   | cox1-trnT IGR |
| <i>Bankia gouldi</i>             | cob-trnM IGR   | cox1-trnT IGR |
| <i>Bankia setacea</i>            | cob-trnM IGR   | cox1-trnT IGR |
| <i>Bankia</i> sp.                | cob-trnM IGR   | cox1-trnT IGR |
| <i>Dicyathifer mannii</i>        | trnC-16S IGR   | trnT-nad4 IGR |
| <i>Kuphus polythalamius</i>      | cob-trnM IGR   | cox1-trnT IGR |
| <i>Lithoredo abatanica</i>       | trnM-trnC IGR  | trnT-nad4 IGR |
| <i>Lyrodus</i> sp.               | cob-trnM IGR   | cox1-trnT IGR |
| <i>Neoterodo reynei</i>          | cob-trnM IGR   | cox1-trnT IGR |
| <i>Nototerodo knoxi</i>          | cob-trnM IGR   | cox1-trnT IGR |
| <i>Teredo bartschi</i>           | cob-trnM IGR   | cox1-trnT IGR |
| <i>Teredo</i> sp.                | cob-trnM IGR   | cox1-trnT IGR |
| <i>Teredothyra matocotana</i>    | trnC-16S IGR   | cox1-trnT IGR |
| <b>Xylophagidae</b>              |                |               |
| <i>Xylonora corona</i>           | 12S-trnI IGR   | ND            |
| <i>Xylonora zierenbergi</i>      | nad4-trnE IGR  | ND            |
| <i>Xylophaga dorsalis</i>        | trnK-trnL2 IGR | ND            |
| <i>Xylophaga oregona</i>         | trnR-cox2 IGR  | ND            |
| <i>Xylophaga washingtona</i>     | trnR-cox2 IGR  | ND            |
| <i>Xylophagaid</i> sp.           | trnC-trnI IGR  | ND            |
| <i>Xyloredo nooi</i>             | trnR-cox2 IGR  | ND            |
| <i>Xyloredo</i> sp.              | trnS1-trnY IGR | ND            |

IGR, intergenic region; ND, not determined; OriH, heavy-strand origin of replication; OriL, light-strand origin of replication; trn, transfer RNA.

and predictable, teredinids are adapted to shallow water, intertidal environments, and floating wood, where exposure to the atmosphere and subsequent desiccation is a significant threat. To combat desiccation, teredinids seal their burrows with their paired pallets, allowing some species to survive for weeks in wood removed from water, but also exposing them to extended periods of anoxia (Lane et al. 1955).

Also interesting is the observation that within Teredinidae, the average amino acid substitution rate (2.34 substitutions/site) estimated for the clade containing the genera *Bactronophorus*, *Neoterodo*, *Bankia*, *Teredo* and *Lyrodus* is significantly higher ( $P=3.5 \times 10^{-8}$ , Kruskal-Wallis H-test) than that estimated for the remaining teredinid mitogenomes (1.84 substitutions/site) (supplementary fig. S7, Supplementary Material online). Several unusual reproductive strategies are observed within this clade. Although the details of reproductive behavior are not known in *Bactronophorus* and *Neoterodo*, internal fertilization is observed in *Bankia*, *Teredo*, and *Lyrodus*. In *Bankia* species, pseudocopulation is known to occur, in which sperm is delivered from the exhalant siphon of one individual to the inhalant siphon of a neighbor (Shipway et al. 2020). After internal fertilization

and before release to the environment, species of *Teredo* and *Lyrodus* brood their young to late larval stages in pouches located on the dorsal side of the gill. Pseudocopulation and larval brooding favor more localized reproduction and more limited larval dispersal. These taxa are also generalists that inhabit many types of floating wood, as opposed to other teredinids that tend to inhabit less mobile habitats such as mangrove roots, sulfidic sediments (Distel et al. 2017) and limestone riverbanks (Shipway, Distel, et al. 2019; Shipway, Rosenberg, et al. 2019). Finally, all of these taxa are hermaphroditic and at least some are known to be capable of self-fertilization (Eckelbarger and Reish 1972). These strategies are likely adaptive for utilization of wood that is often patchily distributed in marine environments. They promote efficient localized settlement on and consumption of floating wood that may be rafted great distances from other wood sources (Treneman, Borges, et al. 2018; Treneman, Carlton, et al. 2018). Additionally, these strategies allow few or even single larvae to initiate new populations on wood islands. However, these same adaptations may also result in genetic bottlenecks resulting from the frequent transport and isolation of small founding populations, which in turn can promote the fixation of mutations. Indeed, this notion is supported by the observed prevalence of cryptic species in some of these taxa (Borges and Merckelbach 2018).

Unfortunately, relatively little is known about reproductive strategies in Xylophagidae. However, a recent study used dynamic energy budget modeling to propose a different strategy for adaptation to life on sparse and patchy wood islands in *Xylonora atlantica*, involving rapid sexual maturation at small adult body size, a long-lived larval dispersal stage and high larval survival rates (Gaudron et al. 2021). If common to other Xylophagidae, this strategy might be less prone to geographic isolation and genetic bottlenecks, leading to greater effective population sizes and more efficient purifying selection.

## Conclusions

Identifying causal relationships between the functional and physiological adaptations of taxa and the observed differences in their mitochondrial genome organization and evolution is notoriously difficult (Ghiselli and Milani 2020; Ghiselli et al. 2021). Here, we show that two bivalve sister clades, Teredinidae and Xylophagidae, have followed very different evolutionary trajectories, one leading to thriving existence in comparatively warm productive surface waters and diverse coastal habitats and the second to considerable success on the comparatively cold, relatively uniform and oligotrophic deep-sea floor. Teredinidae includes very diverse species that are known to thrive in a broad and variable range of environmental conditions

and that span a wide range of life histories, feeding and reproductive strategies, and physiologies. Unfortunately, the parallel properties with respect to Xylophagidae are less well-known, making generalization more difficult. Although we can infer differences based on their distinct respiratory demands, reproductive strategies, bathymetric ranges and the environmental variables that characterize these distributions, distinguishing between these alternatives, or other explanations will require more taxon sampling and better understanding of wood-boring bivalve phylogeny and ecology. Perhaps the most interesting feature of this data set is the contrasting patterns observed in the two families with respect to rates of sequence evolution and rates of genome rearrangement, phenomena which previously have been proposed to be positively correlated (Mortz et al. 2021). While we cannot currently explain these differences, the presented data provide fertile ground for exploration of the environmental, biological, and molecular mechanisms that shape the tempo and mode of mitochondrial evolution.

## Materials and Methods

### Specimen Collection and DNA Extraction

Specimens were collected by a variety of methods ranging from collection by hand, to dredging, and deployment and recovery of wooden substrates (table 1). Specimens were frozen at  $-80^{\circ}\text{C}$  or preserved in 80–100% nondenatured ethanol following collection unless specified otherwise. For Xylophagidae, siphon tissue was dissected from each bivalve, and total genomic DNA was extracted using the DNeasy Blood & Tissue Kit (Qiagen) according to the manufacturer's protocols. Tissue samples collected in Alabama and Florida were preserved in 0.25 M EDTA, pH 8.0 (Sharpe et al. 2020). Total genomic DNA was extracted using the DNeasy Blood & Tissue Kit (Qiagen) and concentrated using the DNA Clean & Concentrator-25 Kit (Zymo Research) following manufacturer's recommended protocols.

### Mitochondrial Genome Sequencing, Assembly, and Annotation

Sequencing platforms and GenBank submission information are outlined in table 2. For Xylophagidae, sequencing of genomic DNA was performed by The Genomic Services Lab at the Hudson Alpha Institute in Huntsville, Alabama using Illumina (San Diego, California, USA)  $2 \times 150$  paired-end TruSeq protocols on an Illumina HiSeq 2500 platform. The paired-end reads from each of the operational taxonomic units (OTUs) were assembled de novo using Ray 2.3.1 (Boisvert et al. 2010) with  $k\text{-mer}=31$ . For Teredinidae, except *Teredo bartschi* and *Bankia setacea*, mitochondrial genomes were extracted from gill tissue

metagenome assemblies that contained both host and symbiont DNA and that were sequenced using Illumina HiSeq 2000 sequencer with 350-bp inserts and 125-bp paired-end reads at the Huntsman Cancer Institute's High-Throughput Genomics Center at the University of Utah. Illumina fastq reads were trimmed using Sickle v1.33 (Joshi and Fass 2011), merged, and converted to FASTA files. Merged FASTA files were assembled using IDBA\_ud v2.0 (Peng et al. 2012) using default parameters. *Teredo* sp. and *Bankia* sp. gill metagenomes were sequenced using Illumina MiSeq. The raw reads were assembled using either the metaspades pipeline of SPAdes (version 3.11.1) (Bankevich et al. 2012) or IDBA-UD (version 2) (Peng et al. 2012). Before assembly, raw reads were merged using BBMerge (v9.02) (Bushnell et al. 2017). Nonmerged reads were filtered and trimmed using FaQCs (Version 1.34) (Wang et al. 2014). Mitochondrial contigs were identified using TBLASTN (Altschul et al. 1997) and the previously published bivalve mitochondrial genome from *Mya arenaria* (Wilson et al. 2016) as bait. For *T. bartschi*, whole genome shotgun (WGS) sequencing was conducted at the New York Genome Center on an Illumina HiSeqX ( $2 \times 150$  bp). Library preparation utilized a TruSeq PCR-free kit (450 bp). The mitochondrial genome was bioinformatically extracted from the WGS run using MitoFinder v1.4 (Allio et al. 2020). MitoFinder employed MEGAHIT (Li, Liu, et al. 2015) for mitogenome assembly and tRNAscan-SE (Chan and Lowe 2019) for tRNA annotation. Annotation of the mitochondrial genomes was conducted initially with MITOS2 web server (Bernt et al. 2013) with default settings and the invertebrate genetic code (i.e., NCBI translation table 5) for mitochondria, followed by manual genome annotation of start and stop positions of each gene using Artemis (Rutherford et al. 2000). The nucleotide base composition across the complete mitochondrial genome, protein-coding gene sequences and 3rd codon position were calculated using Artemis.

### Phylogenetic Methods

Forty-two specimens were included in the phylogenetic analysis (table 1), including 26 Teredinidae and 16 Xylophagidae. *M. arenaria* (Myida), *Meretrix petechialis* (Venerida) and *Solecurtus divaricatus* (Cardiida) were selected as the outgroup for our phylogenetic analysis based on availability in the NCBI RefSeq (O'Leary et al. 2016) database and the current understanding of bivalve evolutionary relationships (Combosch et al. 2017; Lemer et al. 2019). Prior to alignment, nucleotide sequences were translated to amino acids using invertebrate mitochondrial genetic translation code as implemented in Artemis. Each protein-coding gene was individually aligned in MAFFT v7.2.3 (Katoh and Standley 2013) followed by manual correction. Each gene was trimmed using Gblocks (Talavera and

Castresana 2007) to discard ambiguously aligned sites with default parameters. Protein-coding gene alignments were then concatenated into a final supermatrix dataset using FASconCAT (Kuck and Meusemann 2010).

For the supermatrix constructed above, we used three different approaches to infer the shipworm phylogeny: 1) the concatenation (i.e., supermatrix) approach with a single site-homogeneous model or partition, 2) the concatenation approach with data-partitioning by gene, and 3) the concatenation approach with a site-heterogeneous C20 model to account for amino acid compositional heterogeneity. Maximum-likelihood (ML) phylogenetic analysis was conducted using IQ-Tree 1.6.7 (Nguyen et al. 2015). Prior to ML analyses, ModelFinder (Kalyaanamoorthy et al. 2017) was used to evaluate best substitution models for each gene partition. Nodal support for ML analyses was evaluated with 1,000 ultrafast bootstrapping replicates. Note that only bootstrap support  $\geq 95$  should be considered as a strong support for a given bipartition (Minh et al. 2013).

### Mitochondrial Genome Properties

We focused our analyses on the comparisons of five mitochondrial genome properties between Xylophagidae and Teredinidae. Specifically, for a given taxon, 1) amino acid substitution rate was estimated as the distance from the most recent common ancestor shared by Xylophagidae and Teredinidae to each tip on the concatenation-based supermatrix ML tree; 2) GC-content was calculated as the percentage of G and C nucleotides in the complete genome; 3) gene order was determined based on analysis of gene annotations predicted using MITOS 2.0 (Donath et al. 2019); 4) genome size was determined as the number of base pairs per genome, and 5) percent coding sequence was estimated as the number of nucleotides in coding sequences divided by the total genome size  $100\times$ . To determine whether there was a significant difference of properties between Xylophagidae and Teredinidae, we conducted a paired *t*-test with value adjusted by Bonferroni methods using R package rstatix (Team 2021). Branch length differences among subtrees were examined using the Kruskal–Wallis H-test. Scenarios for potential gene rearrangements were explored based on analysis of common intervals using Crex (Bernt et al. 2007) as implemented on the MITOS2 server. The DNA Skew Graphing tool (Thomas et al. 2007), available online via the Viral Bioinformatics Research Centre (<https://4virology.net/>), was used to search representative mitochondrial genomes for abrupt changes in base composition bias that are characteristic of both the heavy-strand origin of replication (OriH) and light-strand origin of replication (OriL). After locating putative origins of replication, we utilized the UNAFold web server (Zuker 2003) to locate stable stem-loop configurations containing characteristic T-rich loops

(see [supplementary figs. S2 and S3, Supplementary Material](#) online; also (Brugler and France 2008) for a list of features typically associated with origins of replication and the application of the “DNA Walker” (Lobry 1996) graphing option to locate putative Oris within a mitogenome).

### Supplementary Material

[Supplementary data](#) are available at *Genome Biology and Evolution* online.

### Acknowledgments

Research reported in this publication was supported by the Fogarty International Center of the National Institutes of Health under Award Number U19TW008163 (to D.L.D.), National Science Foundation awards IOS 1442759 (to D.L.D.), Gordon and Betty Moore Foundation Grant # SMS 9339 (to D.L.D.), National Oceanic and Atmospheric Administration award NA19OAR0110303 (to D.L.D.), National Science Foundation award OCE-1155188 (to K.M.H.), and OCE-1155703 (to C.R.S.). Parts of this work were also supported by the Shandong University Outstanding Youth Fund 62420082260514 (to Y.L.), the National Council of Technological and Scientific Development (CNPq) (<http://cnpq.br>) and by the Coordination for the Improvement of Higher Education Personnel (CAPES) (<http://www.capes.gov.br>) under grant number 400764/2014-8 to A.T.-S. Some DNA sequence data used in this investigation were produced by the US Department of Energy Joint Genome Institute through a grant from the Community Sequencing Program, JGI User Agreement No. FP00002075. Additional financial support was provided by a Cycle 47 PSC-CUNY Research Award (#69191-00-47) and the Port Royal Sound Foundation (to M.R.B.). Resources purchased with funds from the NSF FSML program award DBI 1722553 (to Northeastern University) were used to generate data for this manuscript. Special thanks to Nancy C. Treneman for providing *Teredo bartschi* specimens, Chris Upton, and Paolo Ribeca for providing the latest version of GraphDNA, the Centrai de Genômica e Bioinformática (CeGenBio) from the Unit of Research (NPDM/UFC) AETS, TLB, and FASO. Also, Professor Diego Veras Wilke for the encouragement, exchange of ideas, sampling logistics, and laboratory support.

**Collection Permits:** Collections in Brazil were performed under the following: SISBIO license number 48388 to A.T.-S., and genetic resources were accessed under the authorization of the Brazilian National System for the Management of Genetic Heritage and Associated Traditional Knowledge (SisGen permit number A2F0DA0) to the National Institute of Metrology Standardization and Industrial Quality (Inmetro, Instituto Nacional de



Metrologia, Qualidade e Tecnologia), SISBIO permit N 24700-1 to A.F.B., and SISBIO permit numbers 38674-4 and 57721-1 to P.S. Mitochondrial genome sequencing is registered in SISGEN permit N AB57903 (Nagoya Protocol) to Universidade Federal do Espírito Santo.

Collections in the Philippines were performed under supervision of the Department of Agriculture-Bureau of Fisheries and Aquatic Resources, Philippines (DA-BFAR), in compliance with all required legal instruments and regulatory issuances covering the conduct of the research. All Philippine specimens were collected under Gratuitous Permit numbers FBP-0036-10, GP-0054-11, GP-0064-12, GP-0107-15, and GP-0140-17.

## Author Contributions

The authors confirm contribution to the paper as follows: study conception and design by D.L.D., K.M.H., Y.L., J.R.S.; methods development by D.L.D., Y.L., M.R.B., Z.L., M.A.A.; provision of materials or data by J.R.S., M.A.A., Y.L., A.F.B., P.S., C.R.S., A.T.-S., K.M.H., D.L.D.; data analysis by M.A.A., Y.L., M.R.B., D.L.D., T.L.B., F.A.d.S.O.; manuscript preparation by D.L.D., Y.L., J.R.S., M.A.A., M.R.B., K.M.H. All authors reviewed the results and approved the final version of the manuscript.

## Data Availability

The mitochondrial genome sequences described in this manuscript have been submitted to the Genbank database (NCBI). Accession numbers are listed in [table 2](#). Other datasets generated and/or analyzed during the current study are available in the Figshare repository, <https://figshare.com/s/e0824b4f237b54765717>.

## Literature Cited

Allio R, et al. 2020. MitoFinder: Efficient automated large-scale extraction of mitogenomic data in target enrichment phylogenomics. *Mol Ecol Resour.* 20:892–905.

Altamia MA, et al. 2020. Secondary metabolism in the gill microbiota of shipworms (Teredinidae) as revealed by comparison of metagenomes and nearly complete symbiont genomes. *mSystems* 5: e00261-20.

Altschul SF, et al. 1997. Gapped BLAST and PSI-BLAST: a new generation of protein database search programs. *Nucleic Acids Res.* 25:3389–3402.

Bankevich A, et al. 2012. SPAdes: a new genome assembly algorithm and its applications to single-cell sequencing. *J Comput Biol.* 19: 455–477.

Bernt M, et al. 2007. CReX: inferring genomic rearrangements based on common intervals. *Bioinformatics* 23:2957–2958.

Bernt M, et al. 2013. MITOS: improved de novo metazoan mitochondrial genome annotation. *Mol Phylogenet Evol.* 69:313–319.

Boisvert S, Laviolette F, Corbeil J. 2010. Ray: simultaneous assembly of reads from a mix of high-throughput sequencing technologies. *J Comput Biol.* 17:1519–1533.

Borges LMS, et al. 2022. Out of taxonomic crypsis: a new trans-arctic cryptic species pair corroborated by phylogenetics and molecular evidence. *Mol Phylogenet Evol.* 166:107312.

Borges LMS, Merckelbach LM. 2018. *Lyrodus mersinensis* sp. nov. (Bivalvia: Teredinidae) another cryptic species in the *Lyrodus pedicellatus* (Quatrefages, 1849) complex. *Zootaxa* 4442:441–457.

Brugler MR, France SC. 2008. The mitochondrial genome of a deep-sea bamboo coral (Cnidaria, Anthozoa, Octocorallia, Isididae): genome structure and putative origins of replication are not conserved among octocorals. *J Mol Evol.* 67:125–136.

Bushnell B, Rood J, Singer E. 2017. BBMerge - Accurate paired shotgun read merging via overlap. *PLoS ONE* 12:e0185056.

Chan PP, Lowe TM. 2019. tRNAscan-SE: Searching for tRNA genes in genomic sequences. *Methods Mol Biol.* 1962:1–14.

Combosch DJ, et al. 2017. A family-level tree of life for bivalves based on a Sanger-sequencing approach. *Mol Phylogenet Evol.* 107: 191–208.

Cragg SM, et al. 2020. Vascular plants are globally significant contributors to marine carbon fluxes and sinks. *Annu Rev Mar Sci.* 12: 469–497.

Distel DL. 2003. The biology of marine wood boring bivalves and their bacterial endosymbionts. In: Goodell B Nicholas DD, Schultz TP, editors. *Wood deterioration and preservation*. Washington: American Chemical Society Press. p. 253–271.

Distel DL, et al. 2011. Molecular phylogeny of Pholadoidea Lamarck, 1809 supports a single origin for xylotrophy (wood feeding) and xylotrophic bacterial endosymbiosis in Bivalvia. *Mol Phylogenet Evol.* 61:245–254.

Distel DL, et al. 2017. Discovery of chemoautotrophic symbiosis in the giant shipworm *Kuphus polythalamia* (Bivalvia: Teredinidae) extends wooden-steps theory. *Proc Natl Acad Sci U S A.* 114: E3652–E3658.

Donath A, et al. 2019. Improved annotation of protein-coding genes boundaries in metazoan mitochondrial genomes. *Nucleic Acids Res.* 47:10543–10552.

Eckelbarger KJ, Reish DJ. 1972. A first report of self-fertilization in the wood-boring family teredinidae (Mollusca: Bivalvia). *Bull Southern California Acad Sci.* 71:48–50.

Formaggioni A, Luchetti A, Plazzi F. 2021. Mitochondrial genomic landscape: a portrait of the mitochondrial genome 40 years after the first complete sequence. *Life (Basel)* 11:663.

Gaudron SM, Lefebvre S, Marques GM. 2021. Inferring functional traits in a deep-sea wood-boring bivalve using dynamic energy budget theory. *Sci Rep.* 11:22720.

Ghiselli F, et al. 2021. Molluscan mitochondrial genomes break the rules. *Philos Trans R Soc (Ser. B)* 376:20200159.

Ghiselli F, Milani L. 2020. Linking the mitochondrial genotype to phenotype: a complex endeavour. *Philos Trans R Soc (Ser. B)* 375:20190169.

Grande C, Templado J, Zardoya R. 2008. Evolution of gastropod mitochondrial genome arrangements. *BMC Evol Biol.* 8:61.

Haga T, Kase T. 2013. Progenetic dwarf males in the deep-sea wood-boring genus *Xylophaga* (Bivalvia: Pholadoidea). *J Molluscan Stud.* 79:90–94.

Jayachandran PR, Velásquez M, Jima M. 2022. A new species of wood-boring bivalve (Mollusca: Xylophagidae) from the Eastern Arabian Sea. *Mar Biodiversity* 52(1):1–9.

Jeffries JG. 1861. On a presumed cause of failure in oceanic telegraphy; and on the existence of animal life at great depth in the sea. In: Selby JP Babbington CC Gray JE, Francis W, editors. *Annals and magazine of natural history*. London: Taylor and Francis. p. 254–255.

Joshi NA, Fass JN. 2011. Sickle: A sliding-window, adaptive, quality-based trimming tool for FASTQ files (Version 1.33) [Internet]. Available from: <https://github.com/najoshi/sickle>.



- Kalyaanamoorthy S, Minh BQ, Wong TKF, von Haeseler A, Jermini LS. 2017. ModelFinder: fast model selection for accurate phylogenetic estimates. *Nat Methods* 14:587–589.
- Katoh K, Standley DM. 2013. MAFFT multiple sequence alignment software version 7: improvements in performance and usability. *Mol Biol Evol.* 30:772–780.
- Kong L, et al. 2020. Mitogenomics reveals phylogenetic relationships of Arcoidea (Mollusca, Bivalvia) and multiple independent expansions and contractions in mitochondrial genome size. *Mol Phylogenet Evol.* 150:106857.
- Kuck P, Meusemann K. 2010. FASconCAT: Convenient handling of data matrices. *Mol Phylogenet Evol.* 56:1115–1118.
- Lane CE, Sims RW, Clancey EJ. 1955. Anaerobiosis in *Teredo*. *Am J Physiol.* 183:3.
- Lemer S, Bieler R, Giribet G. 2019. Resolving the relationships of clams and cockles: dense transcriptome sampling drastically improves the bivalve tree of life. *Proc Biol Sci.* 286:20182684.
- Li YN, Kocot KM, et al. 2015. Mitogenomics reveals phylogeny and repeated motifs in control regions of the deep-sea family Siboglinidae (Annelida). *Mol Phylogenet Evol.* 85:221–229.
- Li D, Liu CM, Luo R, Sadakane K, Lam TW. 2015. MEGAHIT: an ultra-fast single-node solution for large and complex metagenomics assembly via succinct de Bruijn graph. *Bioinformatics* 31:1674–1676.
- Lobry JR. 1996. A simple vectorial representation of DNA sequences for the detection of replication origins in bacteria. *Biochimie* 78: 323–326.
- MacIntosh H, de Nys R, Whalan S. 2014. Contrasting life histories in shipworms: growth, reproductive development and fecundity. *J Exp Mar Biol Ecol.* 459:80–86.
- Mikkelsen NT, Kocot KM, Halanych KM. 2018. Mitogenomics reveals phylogenetic relationships of caudofoveate aplousobranch molluscs. *Mol Phylogenet Evol* 127:429–436.
- Minh BQ, Nguyen MA, von Haeseler A. 2013. Ultrafast approximation for phylogenetic bootstrap. *Mol Biol Evol.* 30:1188–1195.
- Miya M, Kawaguchi A, Nishida M. 2001. Mitogenomic exploration of higher teleostean phylogenies: a case study for moderate-scale evolutionary genomics with 38 newly determined complete mitochondrial DNA sequences. *Mol Biol Evol.* 18:1993–2009.
- Mortz M, Levivier A, Lartillot N, Dufresne F, Blier PU. 2021. Long-lived species of bivalves exhibit low MT-DNA substitution rates. *Front Mol Biosci.* 8:626042.
- Nguyen LT, Schmidt HA, von Haeseler A, Minh BQ. 2015. IQ-TREE: a fast and effective stochastic algorithm for estimating maximum-likelihood phylogenies. *Mol Biol Evol.* 32:268–274.
- Nishimoto A, Haga T, Asakura A, Shirayama Y. 2021. Autochthonous production contributes to the diet of wood-boring invertebrates in temperate shallow water. *Oecologia* 196:877–889.
- O’Leary NA, et al. 2016. Reference sequence (RefSeq) database at NCBI: current status, taxonomic expansion, and functional annotation. *Nucleic Acids Res.* 44:D733–D745.
- Osigus HJ, Eitel M, Bernt M, Donath A, Schierwater B. 2013. Mitogenomics at the base of Metazoa. *Mol Phylogenet Evol.* 69: 339–351.
- Parkes L, Keeble A. 2016. The *Teredo* worm and subsea umbilicals: risks and recommendations. *Underwater Technol.* 33:239–243.
- Peng Y, Leung HC, Yiu SM, Chin FY. 2012. IDBA-UD: a de novo assembler for single-cell and metagenomic sequencing data with highly uneven depth. *Bioinformatics* 28:1420–1428.
- Petra Pop R, Christina B, Frank W, Pamela ER, Antje B. 2017. Temporal and spatial variations of bacterial and faunal communities associated with deep-sea wood falls. *PLoS ONE* 12:e0169906.
- Piccini G, et al. 2021. Mitonuclear coevolution, but not nuclear compensation, drives evolution of OXPHOS complexes in bivalves. *Mol Biol Evol.* 38:2597–2614.
- Purchon RD. 1941. On the biology and relationships of the lamellibranch *Xylophaga dorsalis* (Turton). *J Mar Biol Assoc. UK* 25: 1–39.
- Rayes CA, Beattie J, Duggan IC. 2015. Boring through history: an environmental history of the extent, impact and management of marine woodborers in a global and local context, 500 BCE to 1930s CE. *Environ History* 21:477 + .
- Romano C, et al. 2020. Wooden stepping stones: diversity and biogeography of deep-sea wood boring Xylophagidae (Mollusca: Bivalvia) in the North-East Atlantic Ocean, with the description of a new genus. *Front Mar Sci.* 7:640579.
- Rutherford K, et al. 2000. Artemis: sequence visualization and annotation. *Bioinformatics* 16:944–945.
- Sharpe A, et al. 2020. DESS deconstructed: Is EDTA solely responsible for protection of high molecular weight DNA in this common tissue preservative? *PLoS ONE* 15:e0237356.
- Shipway JR, et al. 2016. *Zachsia zenkewitschi* (Teredinidae), a rare and unusual seagrass boring bivalve revisited and redescribed. *PLoS One* 11:e0155269.
- Shipway JR, Distel DL, Rosenberg G, Concepcion GP, Haygood MG. 2019. A rock-boring and rock-ingesting freshwater bivalve (Shipworm) from the Philippines. *World Congress of Malacology; 8/11-16/2019; Pacific Grove, CA: California Academy of Sciences.* p. 178.
- Shipway JR, Rosenberg G, et al. 2019. Shipworm bioerosion of lithic substrates in a freshwater setting, Abatan River, Philippines: Ichnologic, paleoenvironmental and biogeomorphical implications. *PLoS One* 14:e0224551.
- Shipway JR, Treneman NC, Distel DL. 2020. Mate competition during pseudocopulation in shipworms. *Biol Lett.* 16:20200626.
- Smith DR, Snyder M. 2007. Complete mitochondrial DNA sequence of the scallop *Placopecten magellanicus*: evidence of transposition leading to an uncharacteristically large mitochondrial genome. *J Mol Evol.* 65:380–391.
- Stearns REC. 1886. The *Teredo*, or Shipworm. *Am Nat* 20: 131–136.
- Talavera G, Castresana J. 2007. Improvement of phylogenies after removing divergent and ambiguously aligned blocks from protein sequence alignments. *Syst Biol.* 56:564–577.
- Team RC. 2021. R: A language and environment for statistical computing. Vienna, Austria: R Foundation for Statistical Computing.
- Thomas JM, Horspool D, Brown G, Tcherepanov V, Upton C. 2007. GraphDNA: a Java program for graphical display of DNA composition analyses. *BMC Bioinformatics* 8:21.
- Treneman NC, Borges L, et al. 2018. A molecular phylogeny of wood-borers (Teredinidae) from Japanese tsunami marine debris. *Aquatic Invasions* 13:101–112.
- Treneman NC, Carlton JT, et al. 2018. Species diversity and abundance of shipworms (Mollusca: Bivalvia: Teredinidae) in woody marine debris generated by the Great East Japan Earthquake and Tsunami of 2011. *Aquatic Invasions* 13:87–100.
- Turner RD. 1966. A survey and illustrated catalogue of the Teredinidae (Mollusca: Bivalvia). Cambridge, MA: The Museum of Comparative Zoology, Harvard University.
- Turner RD. 1967. Xylophaginae and Teredinidae - a study in contrasts. *American Malacological Union Annual Reports for 1967.* p. 46–48.
- Turner RD. 1971. Australian shipworms. *Australian Nat History* 17: 139–145.
- Turner RD. 2002. On the subfamily Xylophaginae (Family Pholadidae, Bivalvia, Mollusca). *Bull Museum Comp Zool.* 157:223–308.
- Velasquez M, Shipway JR. 2018. A new genus and species of deep-sea wood-boring shipworm (Bivalvia: Teredinidae) *Nivanteredo coronata* n. sp. from the Southwest Pacific. *Mar Biol Res* 14:806–815.

- Voight JR. 2015. Xylotrophic bivalves: aspects of their biology and the impacts of humans. *J Molluscan Stud.* 81:175–186.
- Voight JR. 2016. New Insights on Xylopholas Mollusca: Xylophagaidae: Diversity, Growth and Reproduction. SPIE.
- Voight JR, et al. 2019. Life in wood: preliminary phylogeny of deep-sea wood-boring bivalves (Xylophagaidae), with descriptions of three new genera and one new species. *J Molluscan Stud.* 85:232–243.
- Wang Y, Leung H, Yiu S, Chin F. 2014. MetaCluster-TA: taxonomic annotation for metagenomic data based on assembly-assisted binning. *BMC Genomics* 15(Suppl 1):S12.
- Willer DF, Aldridge DC. 2020. From pest to profit—the potential of shipworms for sustainable aquaculture. *Front Sustain Food Syst* 4:575416.
- Williams ST, et al. 2017. Curious bivalves: systematic utility and unusual properties of anomalodesmatan mitochondrial genomes. *Mol Phylogenet Evol.* 110:60–72.
- Wilson JJ, Hefner M, Walker CW, Page ST. 2016. Complete mitochondrial genome of the soft-shell clam *Mya arenaria*. *Mitochondrial DNA A DNA Mapp Seq Anal.* 27:3553–3554.
- Zhang K, Sun J, Xu T, Qiu J-W, Qian P-Y. 2021. Phylogenetic relationships and adaptation in deep-sea mussels: insights from mitochondrial genomes. *Int J Mol Sci* 22:1900.
- Zuker M. 2003. Mfold web server for nucleic acid folding and hybridization prediction. *Nucleic Acids Res.* 31:3406–3415.

**Associate editor:** Liliana Milani
